# Supplementary material for: Regulating the spin density of CoIIIusing boron-doped carbon dots for enhanced electrocatalytic nitrate reduction
Source: Royal Society of Chemistry journal article supplement (doi:10.1039/d3qi00865g), 2023-01-01
Supplement: d3qi00865g1.pdf [file d3qi00865g1.pdf]

## Supporting Information

### **Regulating Spin Density of Co<sup>III</sup> by Boron-doped Carbon Dots for Enhanced Electrochemical Nitrate Reduction**

*Jingjing Huang,<sup>†</sup> Jingkun Yu,<sup>†</sup> Xingmei Lu, Yingying Wei, Haoqiang Song, Ang Cao, Jinmeng Cai,\*  
Shuang-Quan Zang and Siyu Lu\**

## Experimental section

### Chemical and materials

3-aminobenzene borate hydrochloride ( $C_6H_9BClNO_2$ ), ammonium chloride ( $^{14}NH_4Cl$ ,  $^{15}NH_4Cl$ ), concentrated sulfuric acid ( $H_2SO_4$ ), anhydrous ethanol ( $C_2H_6O$ ), ultra-pure water ( $H_2O$ ), potassium sulfate ( $K_2SO_4$ ), potassium nitrate ( $K^{14}NO_3$ ,  $K^{15}NO_3$ ), Maleic acid ( $C_4H_4O_4$ ),  $CoCl_2 \cdot 6H_2O$ ,  $D_2O$  and Urea ( $CH_4N_2O$ ) were purchased from Aladdin (Shanghai, China). All reagents have not been purified before use.

### Preparation of the electrocatalysts

The preparation process of BCDs is to dissolve  $C_6H_9BClNO_2$  (1 mmol) in deionized water (10 mL), mix it evenly, and keep it under 200 °C in hydrothermal condition for 8 h. 3.2 mmol  $CoCl_2 \cdot 6H_2O$ , 0.3 g BCDs and 15 mmol urea were added into 30 mL of ultra-pure water and stirred for 30 min. The mixed solution was transferred to a 50 mL Teflon-lined stainless steel autoclave, and a clean carbon cloth (CC) ( $3 \times 2 \text{ cm}^2$ ) was placed into the autoclave. The reaction was heated to 120 °C for 6 h. After the reaction, the autoclave was cooled to room temperature. The CC was alternately rinsed with ultra-pure water and ethanol (3 times). The catalyst precursor of BCDs/ $Co(OH)_x$ /CC was then dried in a vacuum oven at 60 °C. Finally, the catalyst precursor of BCDs/ $Co(OH)_x$ /CC was calcined in air at 450 °C for 2 h to obtain BCDs@ $Co_3O_4$ /CC.

### Characterization

Scanning electron microscopy (SEM) images were taken on a Hitachi S-4800 scanning electron microscope (3 kV). Transmission electron microscopy (TEM) images and higher-resolution transmission electron microscopy (HRTEM) images were obtained with a Tecnai G2 F20 system equipped with energy dispersive analysis of X-rays (EDAX) capabilities. X-ray diffraction (XRD) patterns were recorded on a Bruker D8 Focus Diffraction System using a Cu  $K\alpha$  source ( $\lambda = 0.15406 \text{ nm}$ ). X-ray photoelectron spectroscopy (XPS) measurements were performed on a 5000 VersaProbe (PHI) instrument using Al  $K\alpha$  radiation as the excitation source. All spectra were calibrated using the C 1s signal at 284.6 eV due to adventitious hydrocarbons.

### $^{15}N$ isotope labeling experiments

The aforementioned electrochemical nitrate reduction method was used for the isotopically labelled nitrate reduction experiments, except that the nitrogen source was changed to 99.0 atom%  $K^{15}NO_3$ . Using a  $^1H$  NMR method (Bruker 600-MHz system), the amounts of  $^{15}NH_4^+$

and  $^{14}\text{NH}_4^+$  in the electrolyte after the reaction could be qualitatively and quantitatively measured. Taking  $^{15}\text{NH}_4^+$  as an example, the specific steps were as follows: Firstly, a series of 0.5 M  $\text{K}_2\text{SO}_4$  solutions with specific concentrations of  $(^{15}\text{NH}_4)_2\text{SO}_4$  were prepared as standard solutions. Next, the external standard maleic acid ( $\text{C}_4\text{H}_4\text{O}_4$ ) was added to each standard solution to achieve a concentration of 50 ppm. The resulting solutions were then adjusted to pH=1.8 using 4 M sulfuric acid. Subsequently, 0.5 mL of the solution was mixed with 50  $\mu\text{L}$  of deuterium oxide ( $\text{D}_2\text{O}$ ) for the  $^1\text{H}$  NMR measurements.

### Calculation of the Faradaic efficiency (FE) and yield of $\text{NH}_3$

The FE of  $\text{NH}_3$  was calculated using Eq. 1:

$$\text{FE} = (8F \times C_{\text{NH}_4+\text{N}} \times V \times 10^{-3}) / (14 \times Q) \times 100\% \quad (1)$$

The yield of  $\text{NH}_3$  was calculated using the Eq. 2:

$$\text{Yield of } \text{NH}_3 = (C_{\text{NH}_4+\text{N}} \times V \times 10^{-3}) / (14 \times t \times S) \quad (2)$$

where  $V$  is the electrolyte volume in the reactor (0.05 L),  $C_{\text{NH}_4+\text{N}}$  is the concentration of ammonium measured by IC (ppm),  $F$  is the Faraday constant ( $96485 \text{ C mol}^{-1}$ ),  $t$  is the electrolysis time,  $S$  is the geometric area of the electrocatalyst ( $1 \text{ cm}^2$ ), and  $Q$  is the total charge passing through the electrode.

### Density functional theory (DFT) calculation method

All DFT calculations were performed using the Vienna *ab initio* simulation package (VASP 5.4.4).<sup>[1-3]</sup> The Perdew-Burke-Ernzerhof (PBE) function of the Generalized Gradient Approximation (GGA) is used to describe the exchange-correlation energy.<sup>[4]</sup> To describe the expansion of the electronic eigenfunctions, the projector-augmented wave (PAW) method was applied with a kinetic energy cutoff of 500 eV.<sup>[5,6]</sup> The total energy and force convergence threshold were set to  $10^{-4}$  eV and  $0.02 \text{ eV } \text{\AA}^{-1}$ , respectively. The (311) facet of  $\text{Co}_3\text{O}_4$  was the dominant facet identified in XRD and TEM characterization studies. Therefore, a  $\text{Co}_3\text{O}_4(311)$  surface model was built, and a  $2 \times 2$  supercell used as the model system. To simulate the role of BCDs in the BCDs/ $\text{Co}_3\text{O}_4$ /CC catalyst, a graphene layer with B doping was built on the  $\text{Co}_3\text{O}_4$  surface. The Brillouin zone was sampled with a  $2 \times 2 \times 1$  k-point grid of the Monkhorst-Pack scheme.<sup>[7]</sup> The van der Waals interactions were considered using the empirical correction via the DFT+D3 scheme.<sup>[8,9]</sup>

The adsorption energy  $E_{\text{ads}}$  is defined as:

$$E_{\text{ads}} = E_{\text{adsorbates/slab}} - E_{\text{adsorbates}} - E_{\text{slab}} \quad (1)$$

where  $E_{\text{adsorbates/slab}}$ ,  $E_{\text{adsorbates}}$  and  $E_{\text{slab}}$  are the total energy of surface slabs with adsorbates, the free adsorbates, and the bare surface slabs of models, respectively. According to these definitions, a negative  $E_{\text{ads}}$  value indicates an exothermic adsorption process.

The calculated hydrogen electrode model is used to simulate the electrochemical reaction.<sup>[10]</sup> The Gibbs free energy change ( $\Delta G$ ) of each elementary step is calculated by the following formula:

$$\Delta G = \Delta E + \Delta E_{\text{ZPE}} - T\Delta S + \Delta G_{\text{pH}} + \Delta G_{\text{U}} \quad (2)$$

Where  $\Delta E$  is the reaction energy that can be directly obtained by the total energies of DFT.  $\Delta E_{\text{ZPE}}$  and  $\Delta S$  are the difference in zero-point energy and entropy between the products and the reactants at room temperature ( $T = 298.15 \text{ K}$ ), respectively. The difference in zero-point energy could be calculated from the vibration frequency. The entropy and vibrational frequencies of free molecules (such as  $\text{H}_2$ , and  $\text{NH}_3$ ) were taken from the NIST database. The effect of the applied electrode potential and pH are contained by the correction of  $\Delta G_{\text{U}}$  and  $\Delta G_{\text{pH}}$ , respectively.

## Figures

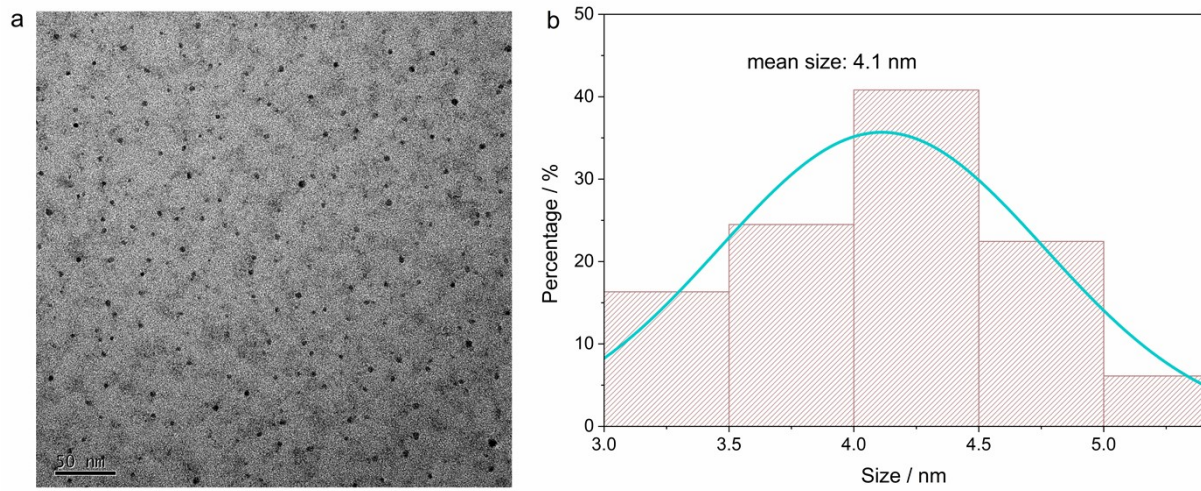

**Figure S1.** (a) The TEM image and (b) size distribution diagram of BCDs.

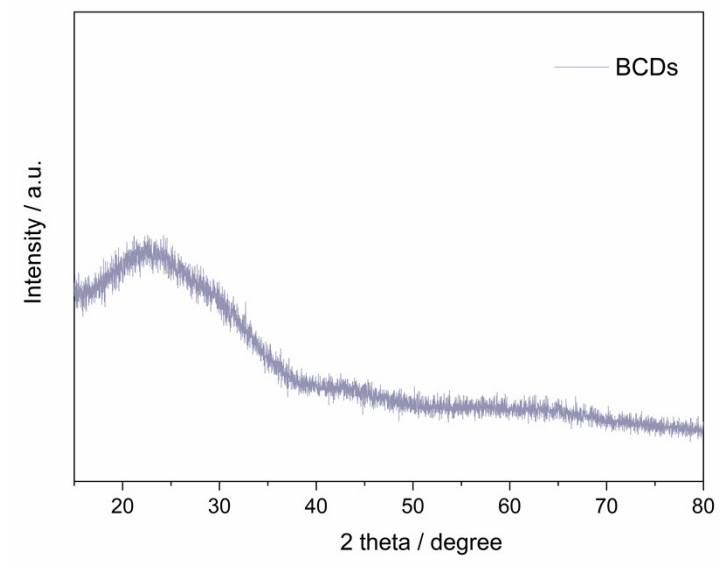

**Figure S2.** The XRD spectrum of BCDs.

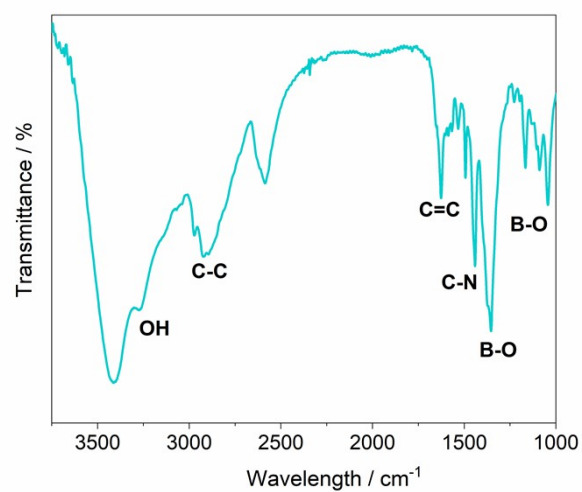

**Figure S3.** The Fourier transform infrared spectroscopy (FT-IR) of BCDs.

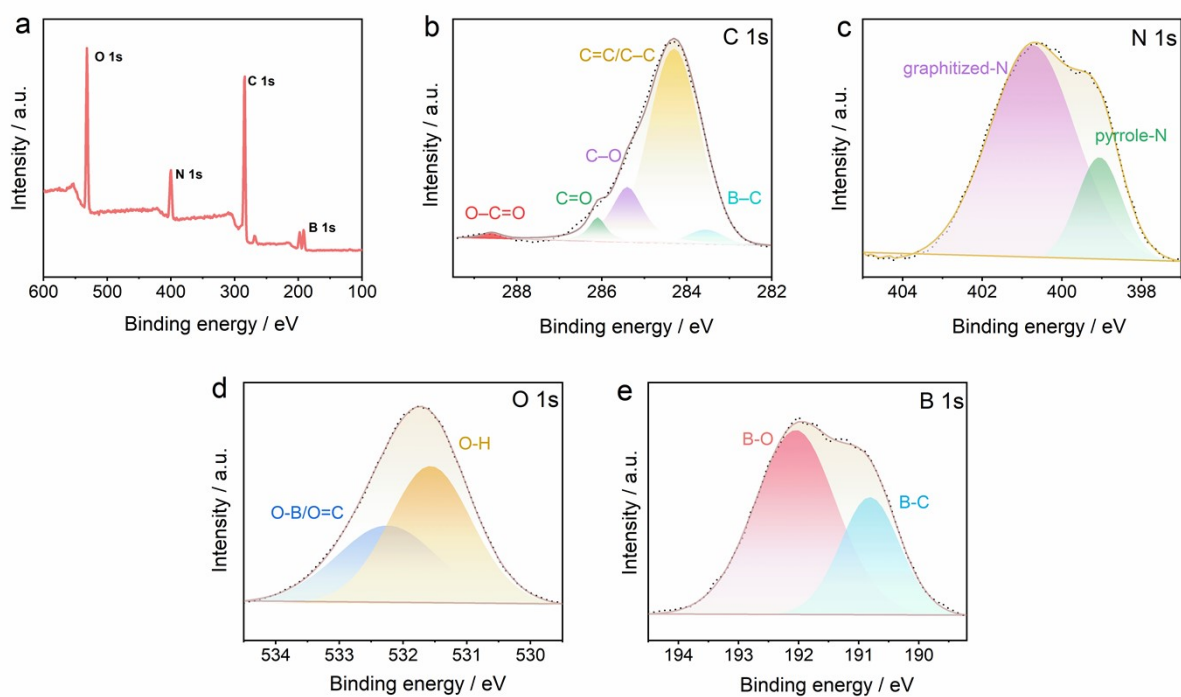

**Figure S4.** XPS spectra of BCDs. (a) Survey spectrum. (b) C 1s. (c) N 1s. (d) O 1s. (e) B 1s.



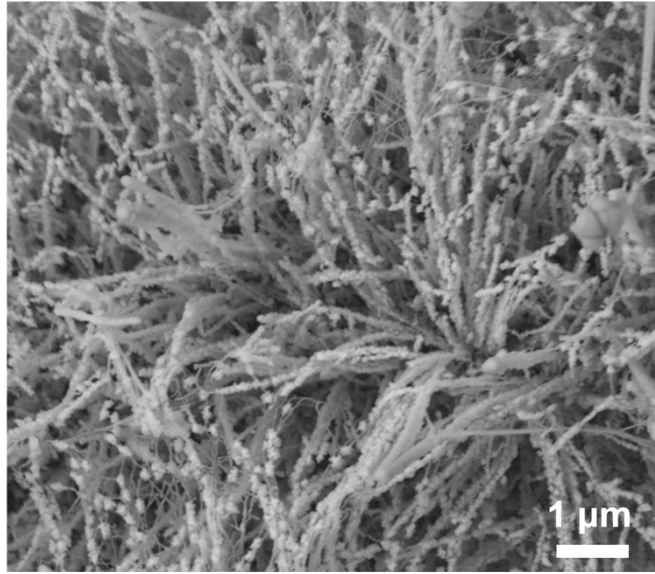

**Figure S5.** SEM image of  $\text{Co}_3\text{O}_4/\text{CC}$ .

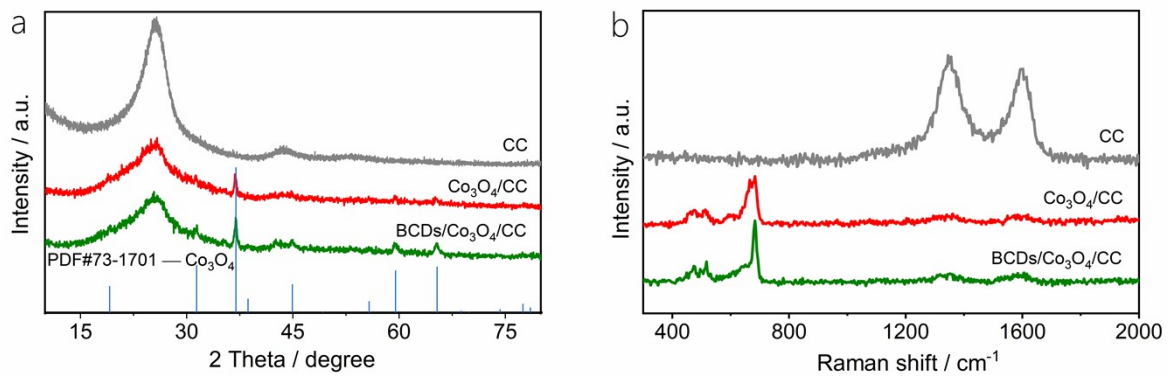

**Figure S6.** (a) XRD and (b) Raman spectra of BCDs/Co<sub>3</sub>O<sub>4</sub>/CC, Co<sub>3</sub>O<sub>4</sub>/CC and CC.

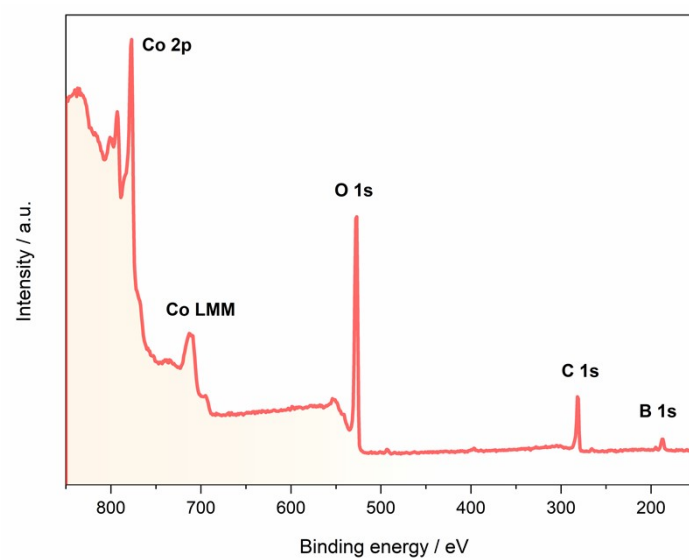

**Figure S7.** XPS survey spectrum of BCDs/Co<sub>3</sub>O<sub>4</sub>/CC.

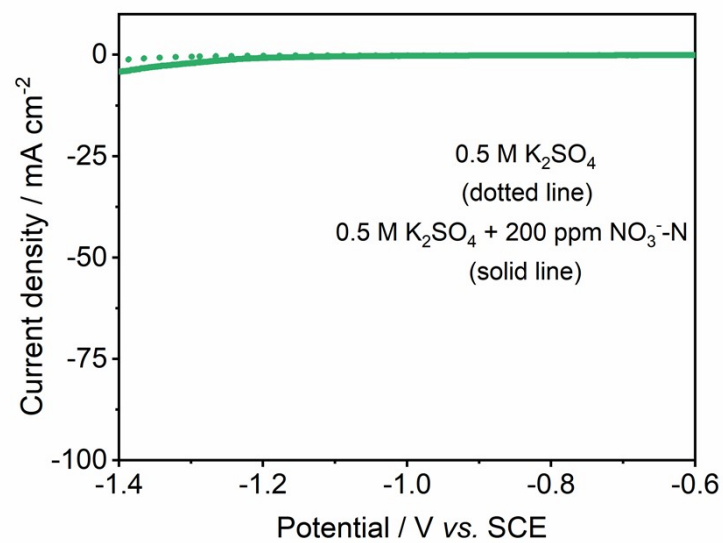

**Figure R8.** LSV curves of BCDs/CC collected in a 0.5 M K<sub>2</sub>SO<sub>4</sub> electrolyte (dotted line) and a 0.5 M K<sub>2</sub>SO<sub>4</sub> + 200 ppm NO<sub>3</sub><sup>-</sup>-N electrolyte (solid line).

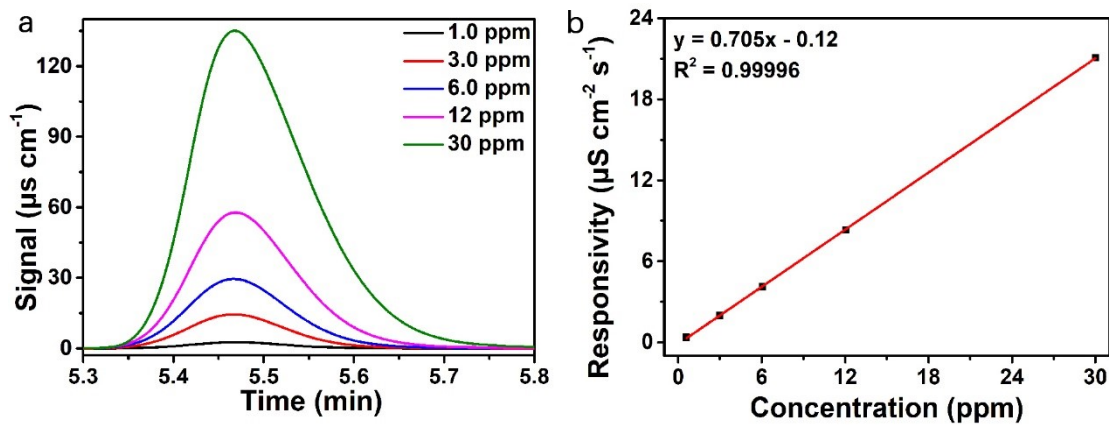

**Figure S9.** IC standard curves of NO<sub>3</sub><sup>-</sup>-N. (a) IC spectra for KNO<sub>3</sub> solutions with different NO<sub>3</sub><sup>-</sup>-N concentrations. (b) Calibration curve of NO<sub>3</sub><sup>-</sup>-N.

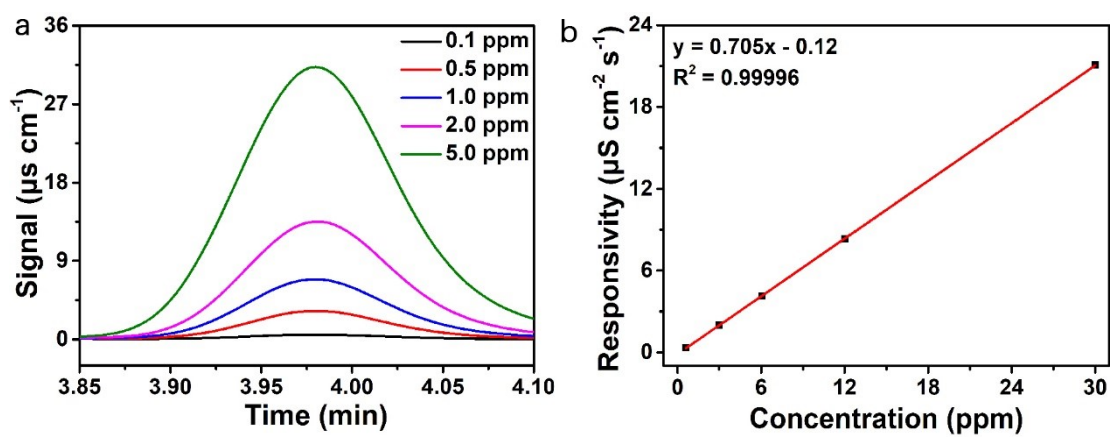

**Figure S10.** IC standard curves of NO<sub>2</sub><sup>-</sup>-N. (a) IC spectra for KNO<sub>2</sub> solutions with different NO<sub>2</sub><sup>-</sup>-N concentrations. (b) Calibration curve of NO<sub>2</sub><sup>-</sup>-N.

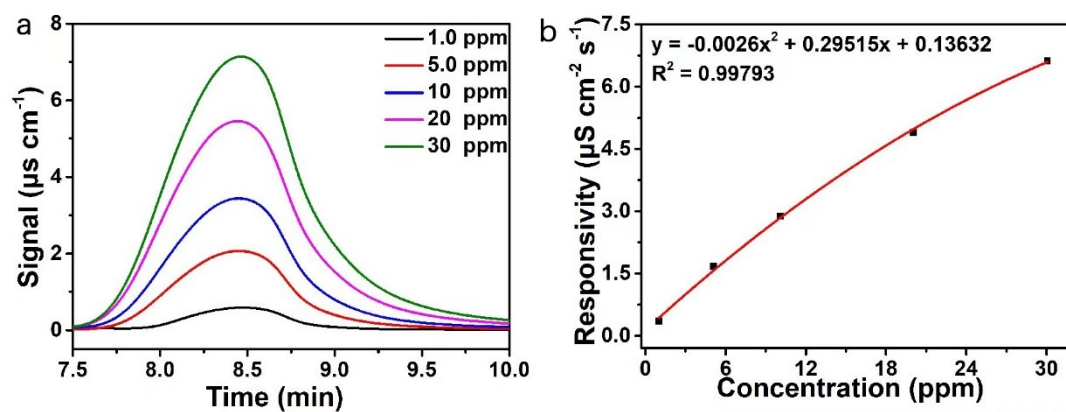

**Figure S11.** IC standard curves of NH<sub>4</sub><sup>+</sup>-N. (a) IC spectra for NH<sub>4</sub>Cl solutions with different NH<sub>4</sub><sup>+</sup>-N concentrations. (b) Calibration curve of NH<sub>4</sub><sup>+</sup>-N.

## References

- [1] Kresse G., Hafner J. Ab initio molecular dynamics for liquid metals. *Phys. Rev. B*, **1993**, *47*, 558.
- [2] Kresse G, Hafner J. Ab initio molecular-dynamics simulation of the liquid-metal-amorphous-semiconductor transition in germanium. *Phys. Rev. B*, **1994**, *49*, 14251.
- [3] Kresse G., Furthmüller J. Efficient iterative schemes for ab initio total-energy calculations using a plane-wave basis set. *Phys. Rev. B*, **1996**, *54*, 11169.
- [4] Perdew J., Burke K., Ernzerhof M. Generalized gradient approximation made simple. *Phys. Rev. Lett.*, **1996**, *77*, 3865.
- [5] Blochl P. Projector augmented-wave method. *Phys. Rev. B*, **1994**, *50*, 17953.
- [6] Kresse G., Joubert D. From ultrasoft pseudopotentials to the projector augmented-wave method. *Phys. Rev. B*, **1999**, *59*, 1758.
- [7] Monkhorst H., Pack J. Special points for Brillouin-zone integrations. *Phys. Rev. B*, **1976**, *13*, 5188.
- [8] Grimme S., Antony J., Ehrlich S., et al. A consistent and accurate ab initio parametrization of density functional dispersion correction (DFT-D) for the 94 elements H-Pu. *J. Chem. Phys.*, **2010**, *132*, 154104.
- [9] Grimme S., Ehrlich S., Goerigk L. Effect of the damping function in dispersion corrected density functional theory. *J. Comput. Chem.*, **2011**, *32*, 1456.
- [10] Nørskov J., Rossmeisl J., Logadottir A., et al. Origin of the overpotential for oxygen reduction at a fuel-cell cathode. *J. Phys. Chem. B*, **2004**, *108*, 17886.
